# Supplementary material for: A Fluoroponytailed NHC–Silver Complex Formed from Vinylimidazolium/AgNO3 under Aqueous–Ammoniacal Conditions
Source: MDPI journal article supplement (doi:10.3390/molecules27134137), 2022-06-28
Supplement: s1 [file s1]

# Supporting Information

## A Fluoroponytailed NHC- Silver Complex formed from Vinyl-imidazolium /AgNO<sub>3</sub> under Aqueous-Ammoniacal Conditions

Gabriel Partl <sup>1</sup>, Marcus Rauter <sup>2</sup>, Lukas Fliri <sup>3</sup>, Thomas Gelbrich <sup>4</sup>, Christoph Kreutz <sup>5</sup>, Thomas Müller <sup>5</sup>, Volker Kahlenberg <sup>6</sup>, Sven Nerdinger <sup>7\*</sup> and Herwig Schottenberger <sup>1\*</sup>

<sup>1</sup> Institute of General, Inorganic and Theoretical Chemistry, University of Innsbruck, CCB, Innrain 80-82, 6020 Innsbruck, Austria; [gabriel.j.partl@gmail.com](mailto:gabriel.j.partl@gmail.com); [herwig.schottenberger@uibk.ac.at](mailto:herwig.schottenberger@uibk.ac.at)

<sup>2</sup> Infineon Technologies AG, Siemensstrasse 2, 9500 Villach, Austria; [marcus.rauter@infineon.com](mailto:marcus.rauter@infineon.com)

<sup>3</sup> Aalto University, Department of Bioproducts and Biosystems, Post Office Box 16300, 00076 Aalto, Finland; [lukas.fliri@aalto.fi](mailto:lukas.fliri@aalto.fi)

<sup>4</sup> Institute of Pharmacy, Leopold Franzens University of Innsbruck, Innrain 52c, 6020 Innsbruck, Austria; [thomas.gelbrich@uibk.ac.at](mailto:thomas.gelbrich@uibk.ac.at)

<sup>5</sup> Institute Organic Chemistry, University of Innsbruck, CCB, Innrain 80-82, 6020 Innsbruck, Austria; [thomas.mueller@uibk.ac.at](mailto:thomas.mueller@uibk.ac.at); [Christoph.kreutz@uibk.ac.at](mailto:Christoph.kreutz@uibk.ac.at)

<sup>6</sup> Institute of Mineralogy & Petrography, University of Innsbruck, Innrain 52, 6020 Innsbruck, Austria; [volker.kahlenberg@uibk.ac.at](mailto:volker.kahlenberg@uibk.ac.at)

<sup>7</sup> Sandoz GmbH, Biochemiestr. 10, 6250 Kundl, Austria; [sven.nerdinger@sandoz.com](mailto:sven.nerdinger@sandoz.com)

\* Correspondence: [sven.nerdinger@sandoz.com](mailto:sven.nerdinger@sandoz.com); [herwig.schottenberger@uibk.ac.at](mailto:herwig.schottenberger@uibk.ac.at)

† Dedicated to the memory of Professor Victor Snieckus.

# Content

|                                                                                                                                                                                                                                                                                                     |   |
|-----------------------------------------------------------------------------------------------------------------------------------------------------------------------------------------------------------------------------------------------------------------------------------------------------|---|
| <b>Figure S1:</b> $^{13}\text{C}$ NMR spectrum (176 MHz, acetone- $\text{d}_6$ ) of [bis(3-(1H,1H,2H,2H-perfluorooctyl)-1-vinylimidazol-2-ylidene)silver(I)] nitrate ( $\text{Ag}(\text{FNHC})_2\text{NO}_3$ ).....                                                                                 | 3 |
| <b>Figure S2:</b> $^1\text{H}$ NMR spectrum (300 MHz, acetone- $\text{d}_6$ ) of $\text{Ag}(\text{FNHC})_2\text{NO}_3$ .....                                                                                                                                                                        | 3 |
| <b>Figure S3:</b> $^{19}\text{F}$ NMR spectrum (659 MHz, acetone- $\text{d}_6$ ) of $\text{Ag}(\text{FNHC})_2\text{NO}_3$ .....                                                                                                                                                                     | 4 |
| <b>Figure S4:</b> $^{19}\text{F}$ - $^{13}\text{C}$ HSQC NMR spectrum ( $^{19}\text{F}$ frequency =659 MHz, acetone- $\text{d}_6$ ) of $\text{Ag}(\text{FNHC})_2\text{NO}_3$ . $^{13}\text{C}$ ( $^{19}\text{F}$ decoupled) trace is shown on the left; $^{19}\text{F}$ trace is shown on top. .... | 4 |
| <b>Figure S5:</b> ATR-FT-IR spectrum (neat) of $\text{Ag}(\text{FNHC})_2\text{NO}_3$ . ....                                                                                                                                                                                                         | 5 |
| <b>Figure S6:</b> Plot showing Ag-C bond lengths (x-axis) and their corresponding C-Ag-C bond angles (y-axis) in reported bis-carbene-Ag complexes in comparison to those of $\text{Ag}(\text{FNHC})_2\text{NO}_3$ . ....                                                                           | 6 |
| <b>Figure S7:</b> Powder diffractogram of $\text{Ag}(\text{FNHC})_2\text{NO}_3$ (top) and comparison to simulated powder diffraction pattern (bottom). ....                                                                                                                                         | 7 |
| <b>Figure S8:</b> High resolution mass spectrum of $\text{Ag}^+(\text{FNHC})_2$ (top) and simulated spectrum thereof (bottom). The peak at 441.0610 m/z is attributable to the 3-(1H,1H,2H,2H-perfluorooctyl)-1-vinylimidazolium ion. ....                                                          | 7 |
| <b>Figure S9:</b> High resolution mass spectrum of the molecule ion peak $\text{Ag}^+(\text{FNHC})_2$ (top) and simulated spectrum thereof (bottom).....                                                                                                                                            | 8 |
| <b>Elemental analysis</b> .....                                                                                                                                                                                                                                                                     | 8 |

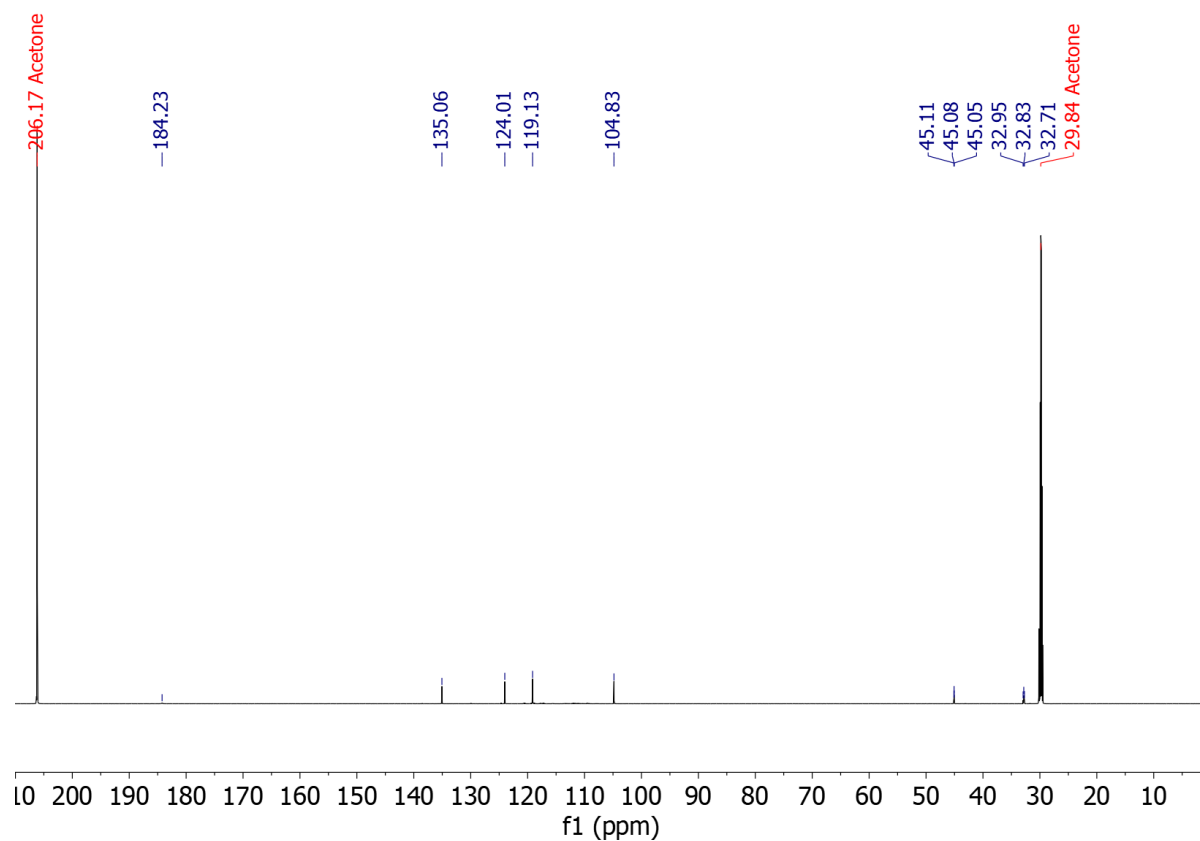

**Figure S1:** <sup>13</sup>C NMR spectrum (176 MHz, acetone-*d*<sub>6</sub>) of [bis(3-(1*H*,1*H*,2*H*,2*H*-perfluorooctyl)-1-vinylimidazol-2-ylidene)silver(I)] nitrate (**Ag**(FNHC)<sub>2</sub>NO<sub>3</sub>).

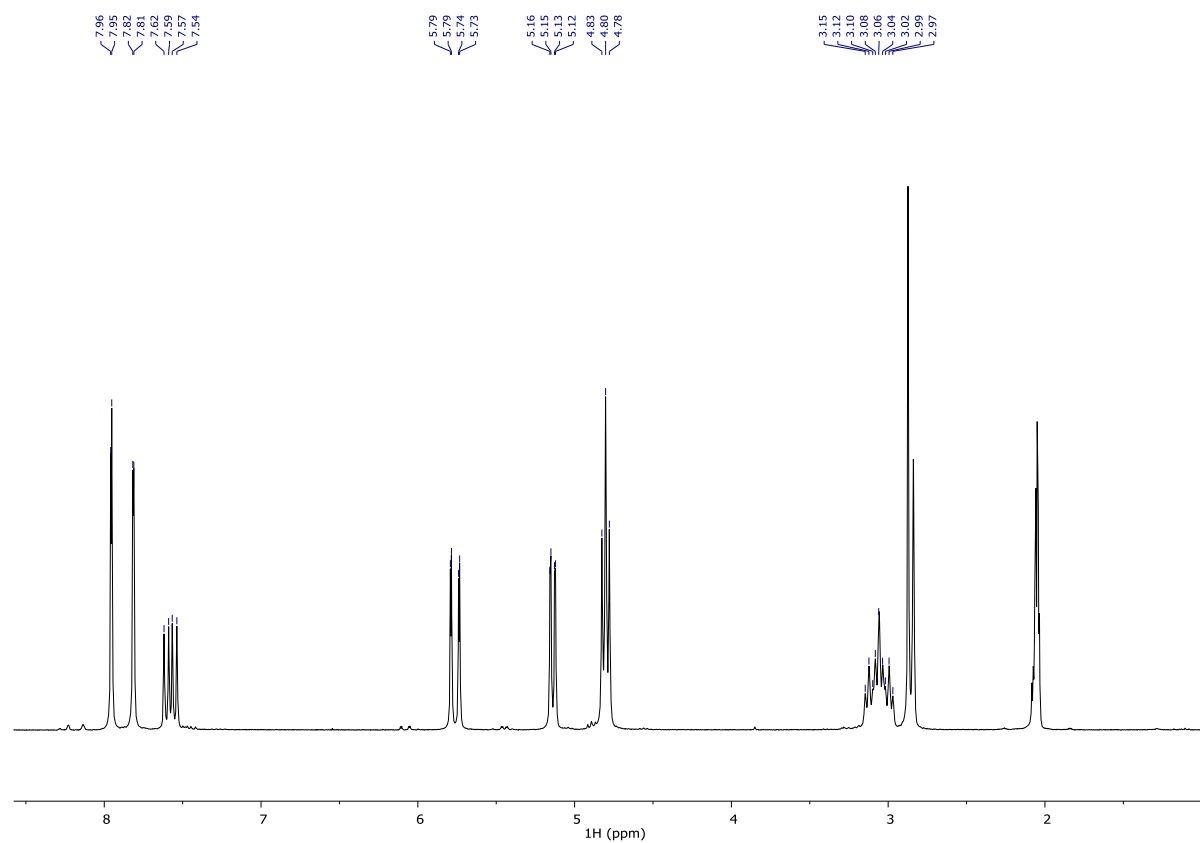

**Figure S2:** <sup>1</sup>H NMR spectrum (300 MHz, acetone-*d*<sub>6</sub>) of **Ag**(FNHC)<sub>2</sub>NO<sub>3</sub>.

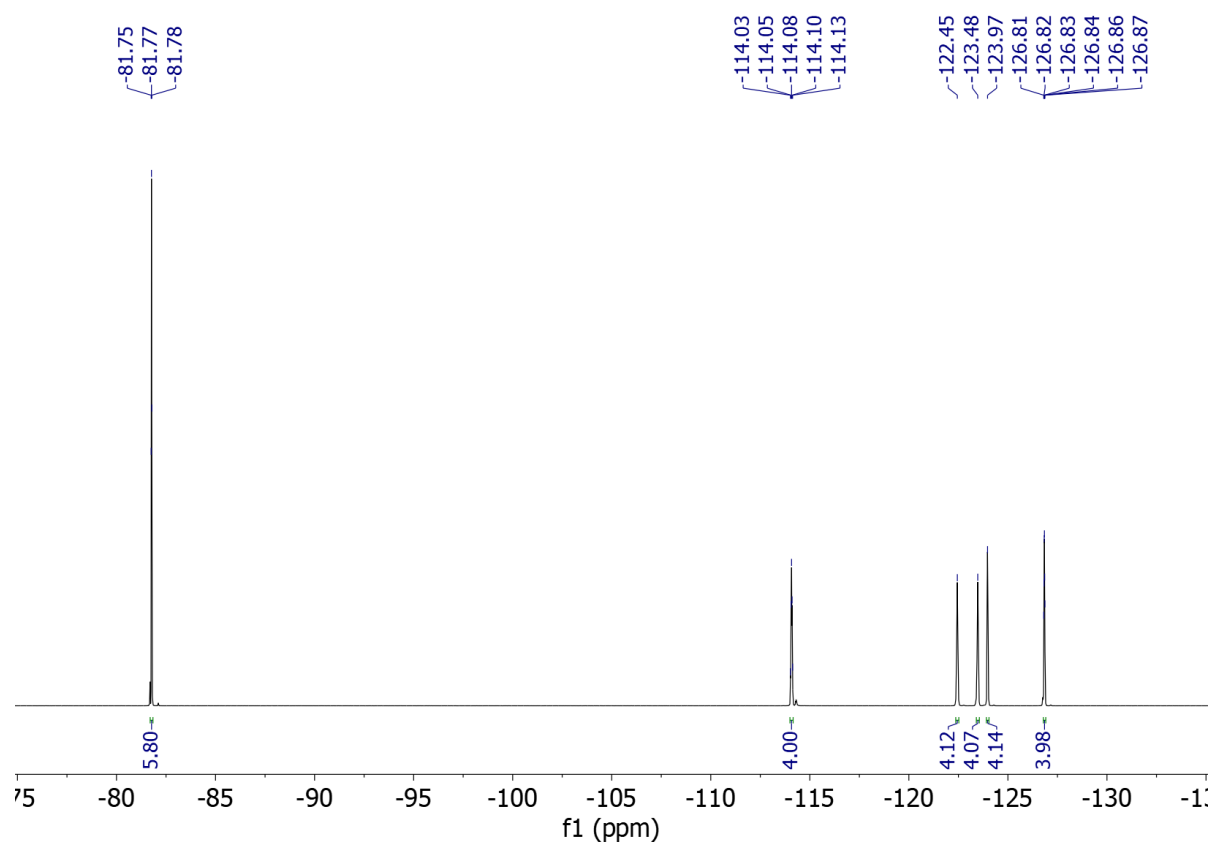

**Figure S3:** <sup>19</sup>F NMR spectrum (659 MHz, acetone-*d*<sub>6</sub>) of Ag(FNHC)<sub>2</sub>NO<sub>3</sub>.

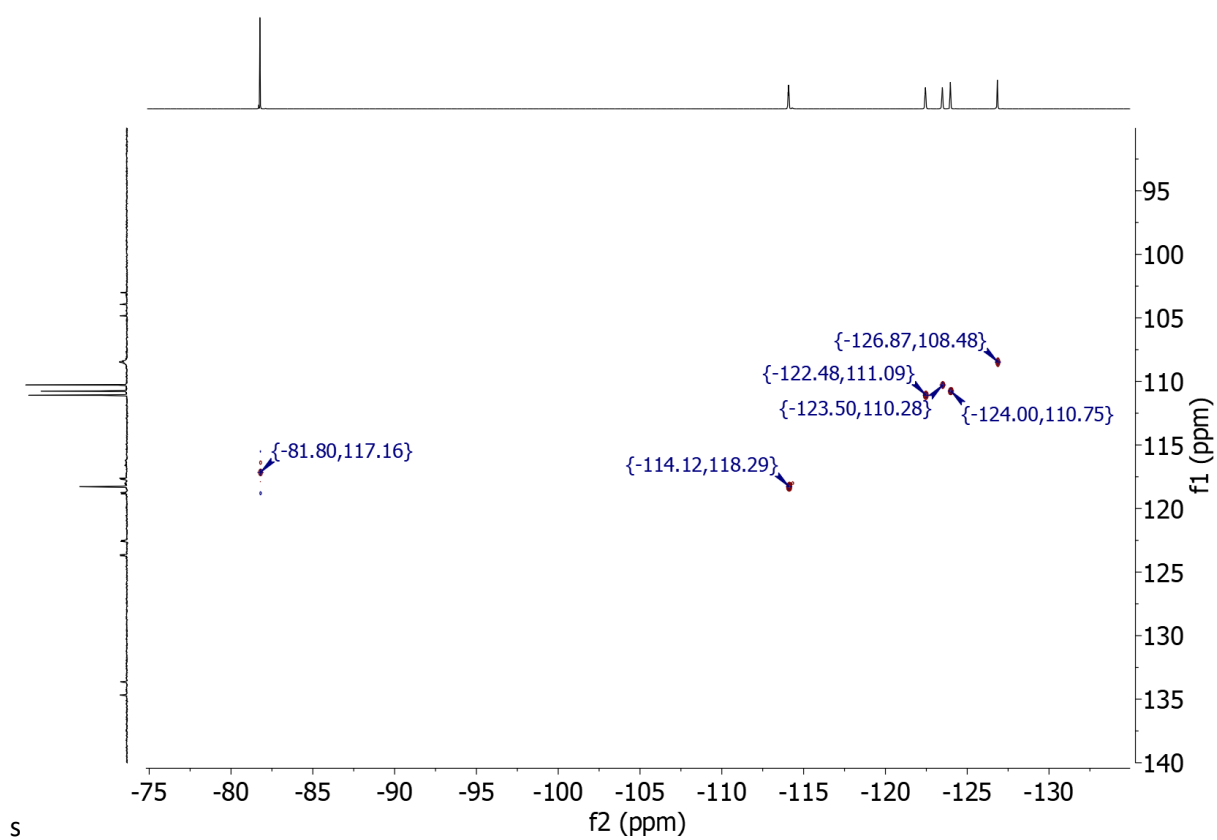

**Figure S4:** <sup>19</sup>F - <sup>13</sup>C HSQC NMR spectrum (<sup>19</sup>F frequency = 659 MHz, acetone-*d*<sub>6</sub>) of Ag(FNHC)<sub>2</sub>NO<sub>3</sub>. <sup>13</sup>C (<sup>19</sup>F decoupled) trace is shown on the left; <sup>19</sup>F trace is shown on top.

Note: For clarity and better s/n ratio, the  $^{13}\text{C}$  trace shown in Figure S4 is  $^{19}\text{F}$  decoupled. The  $^{13}\text{C}$  trace in Figure S1 is  $^1\text{H}$  decoupled and thus looks markedly different.

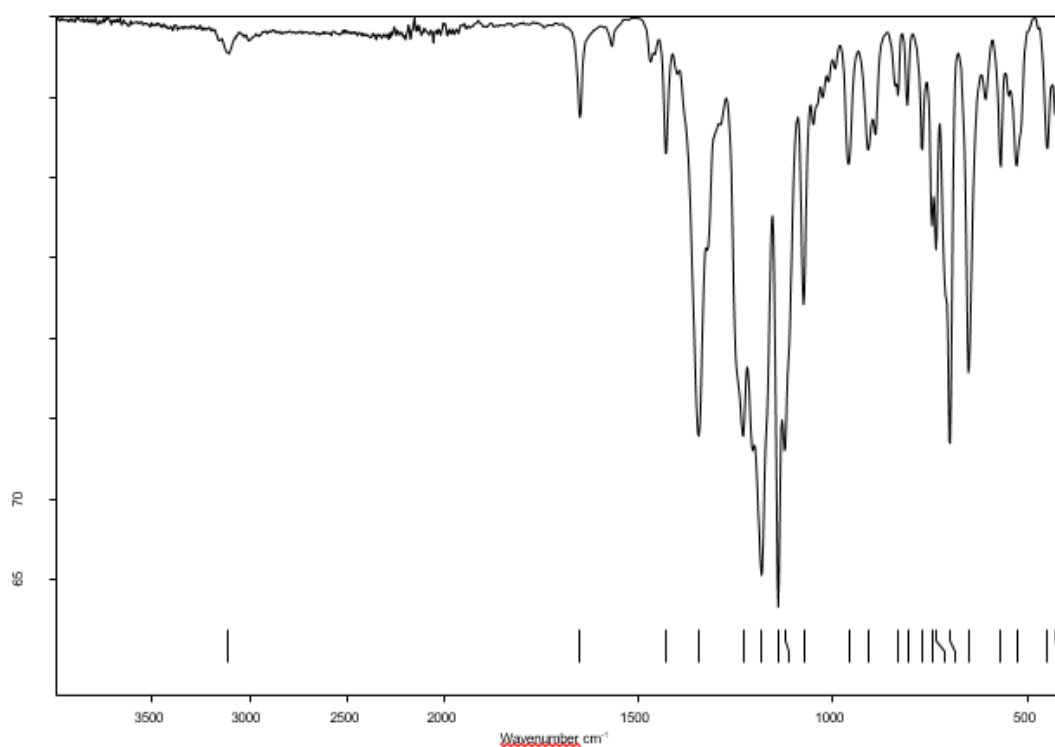

**Figure S5:** ATR-FT-IR spectrum (neat) of  $\text{Ag}(\text{FNHC})_2\text{NO}_3$ .

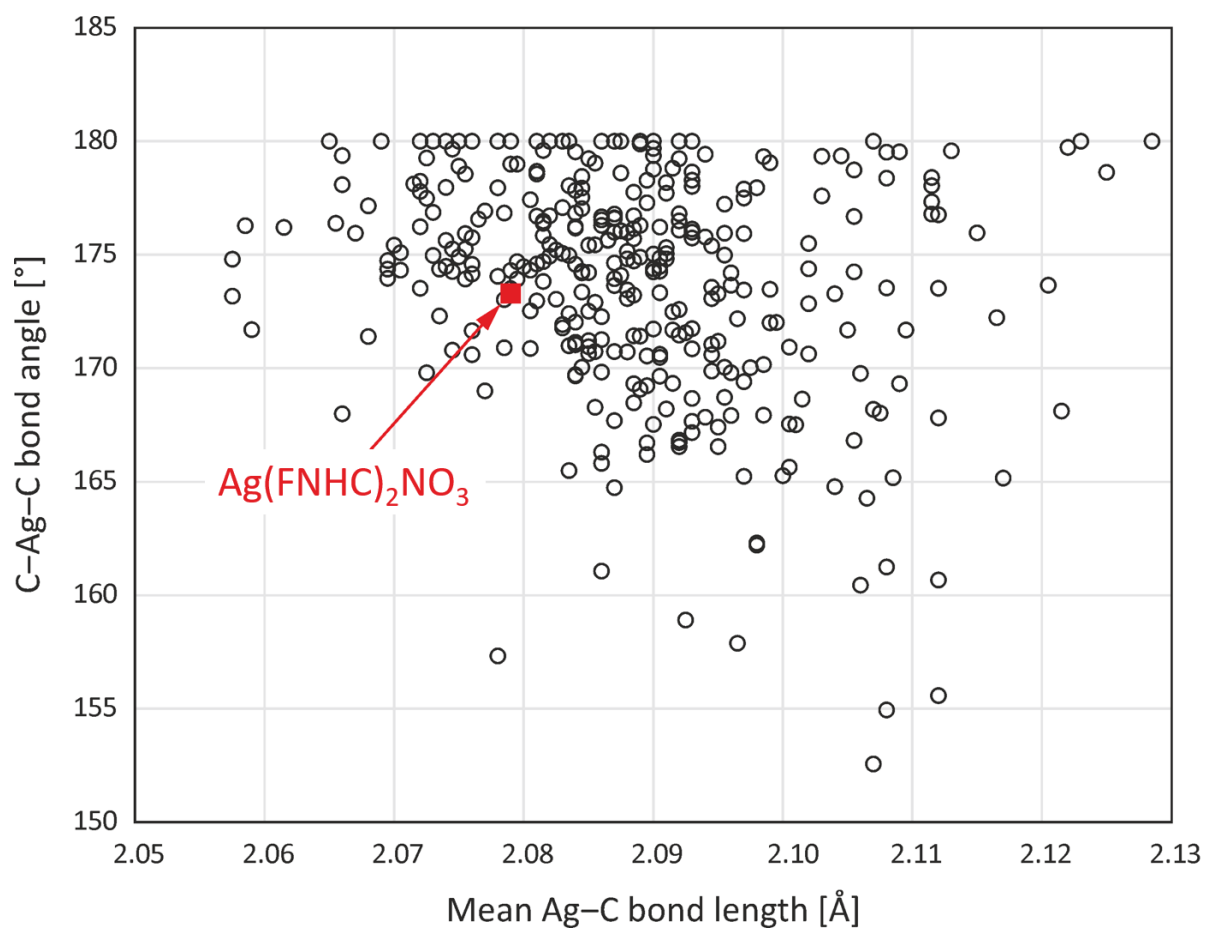

**Figure S6:** Plot showing Ag-C bond lengths (x-axis) and their corresponding C-Ag-C bond angles (y-axis) in reported bis-carbene-Ag complexes in comparison to those of  $\text{Ag}(\text{FNHC})_2\text{NO}_3$ .

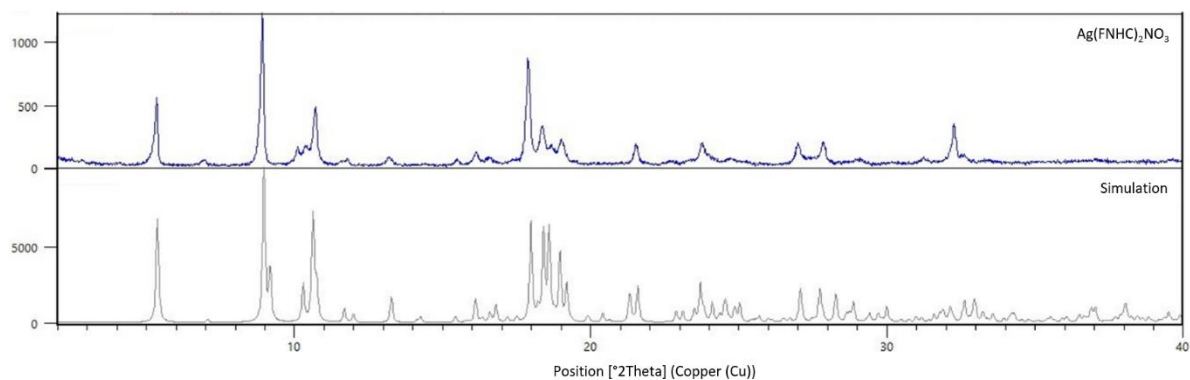

**Figure S7:** Powder diffractogram of  $\text{Ag}(\text{FNHC})_2\text{NO}_3$  (top) and comparison to simulated powder diffraction pattern (bottom).

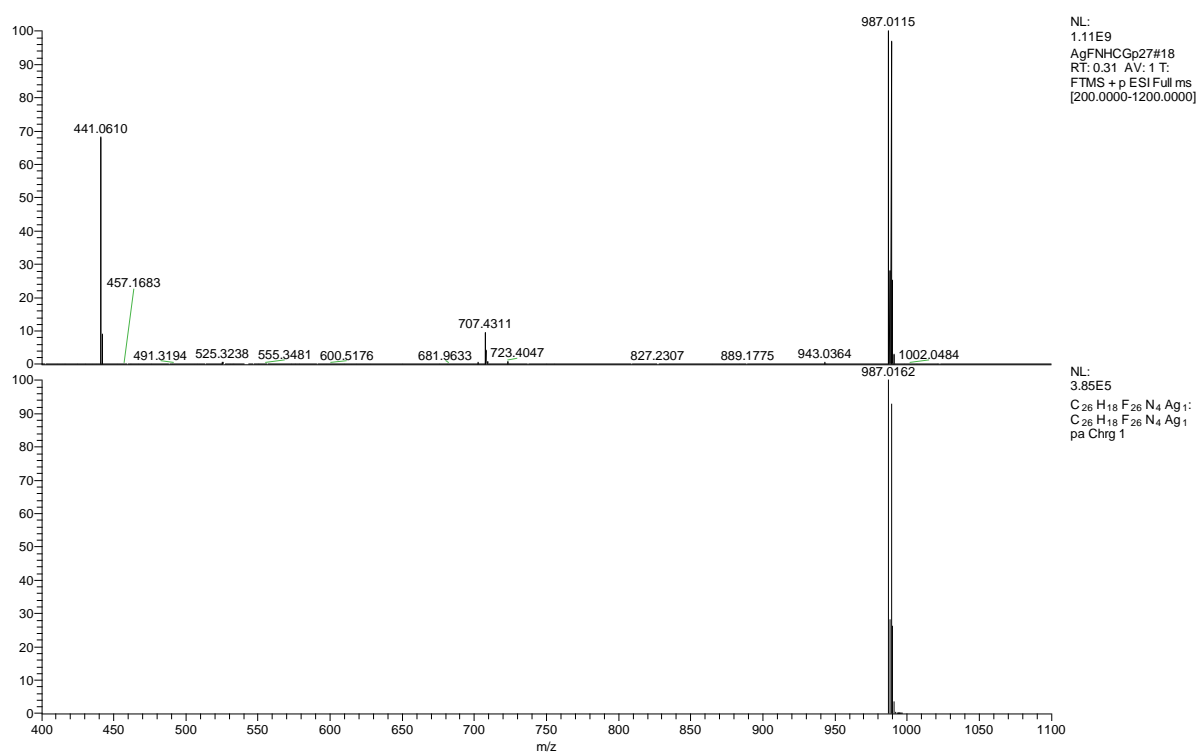

**Figure S8:** High resolution mass spectrum of  $\text{Ag}^+(\text{FNHC})_2$  (top) and simulated spectrum thereof (bottom). The peak at 441.0610  $m/z$  is attributable to the 3-(1*H*,1*H*,2*H*,2*H*-perfluorooctyl)-1-vinylimidazolium ion.

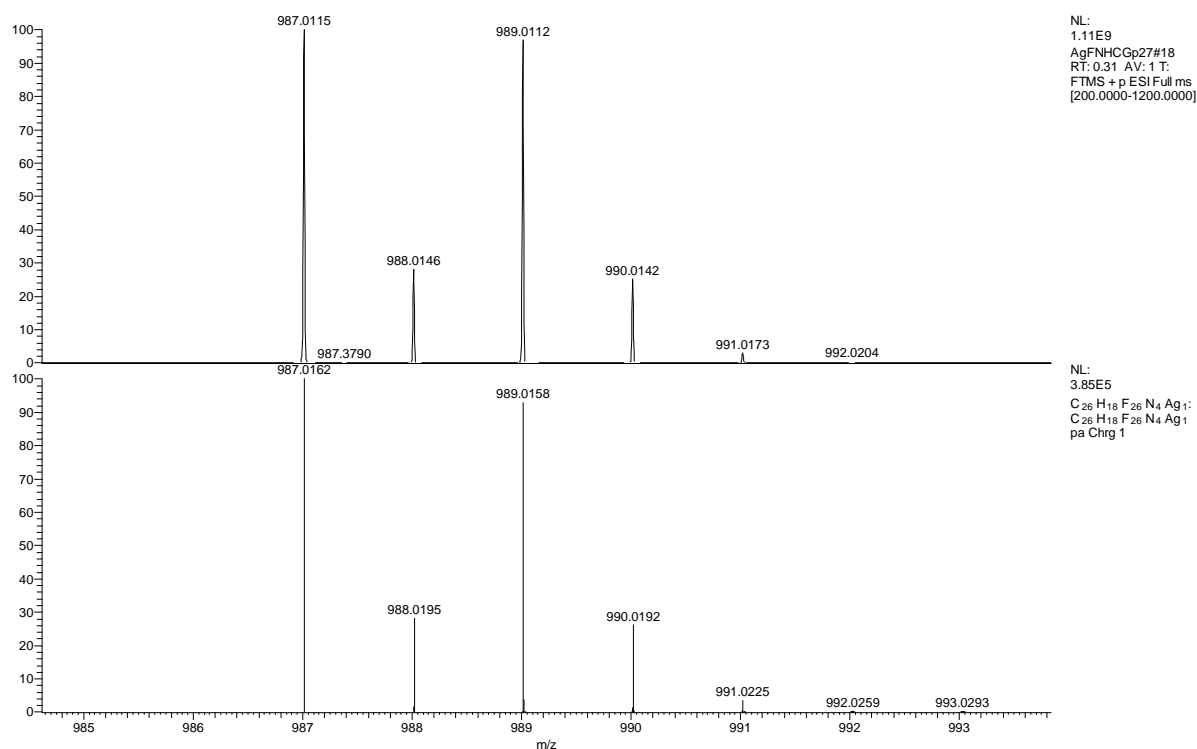

**Figure S9:** High resolution mass spectrum of the molecule ion peak  $\text{Ag}^+(\text{FNHC})_2$  (top) and simulated spectrum thereof (bottom).

### Elemental analysis

| Elemental composition values for $\text{C}_{26}\text{H}_{18}\text{AgF}_{26}\text{N}_5\text{O}_3$ | Calculated | Found  |
|--------------------------------------------------------------------------------------------------|------------|--------|
| C                                                                                                | 29.73 %    | 28.61% |
| H                                                                                                | 1.73 %     | 1.55%  |
| N                                                                                                | 6.67%      | 6.36%  |

Note: Composition values for carbon and hydrogen likely deviate from the expected values due to reluctant combustion behavior of the polyfluorinated compound.
